# Supplementary material
Source: PubMed Central journal article supplement (PMC2000520)

*Dmbx1*<sup>+/+</sup>

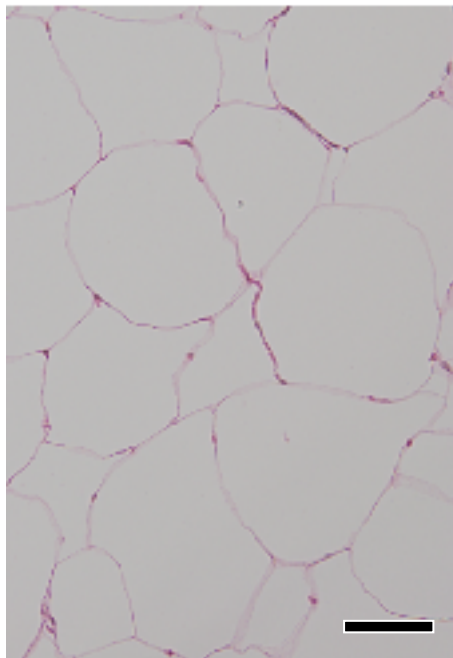

*Dmbx1*<sup>-/-</sup>

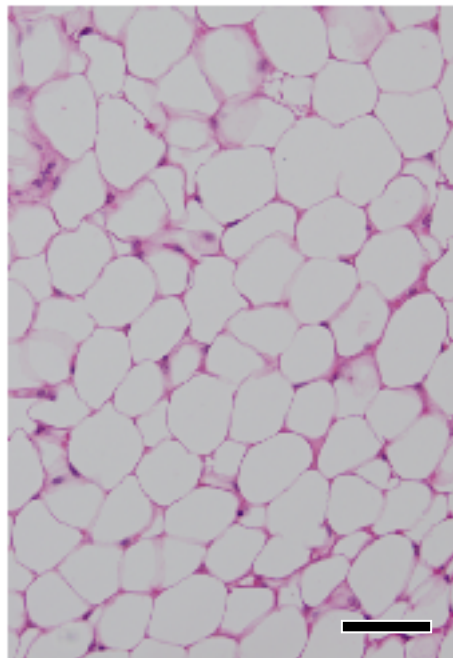

Supplement: pnas_0707328104_1.pdf [file pnas_0707328104_1.pdf]

**A**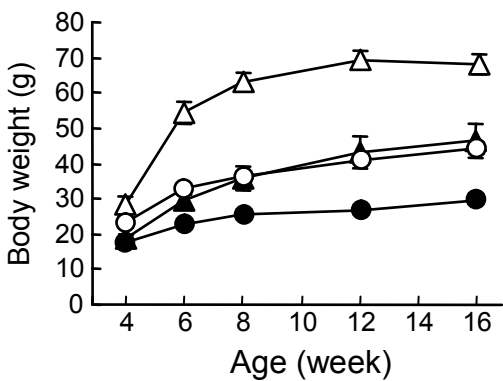**B**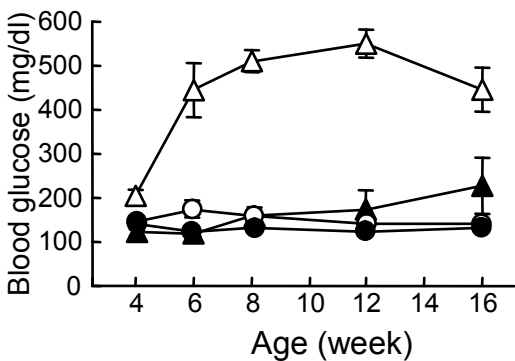**C**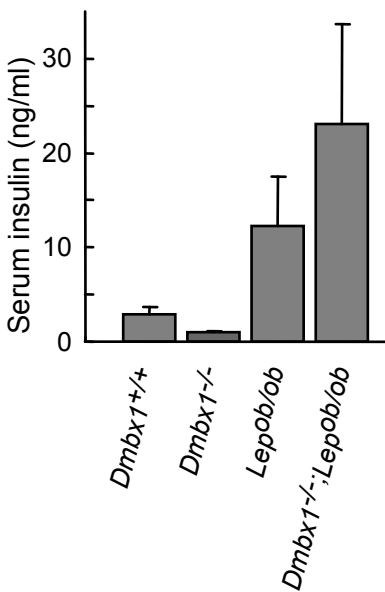

Supplement: pnas_0707328104_2.pdf [file pnas_0707328104_2.pdf]

*Dmbx1*<sup>+/+</sup>

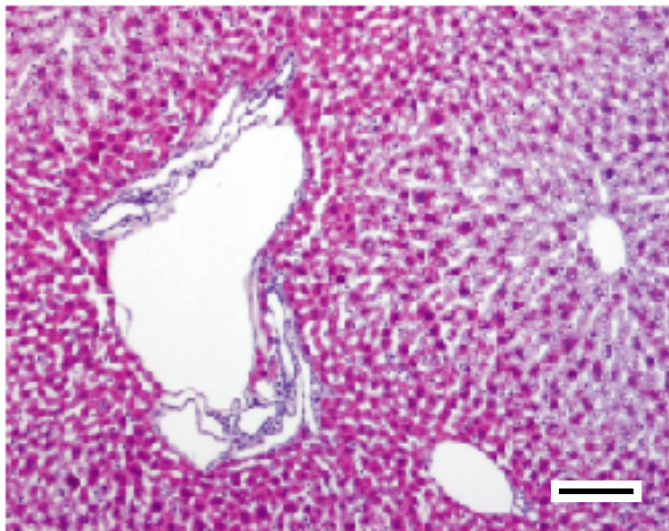

*Dmbx1*<sup>-/-</sup>

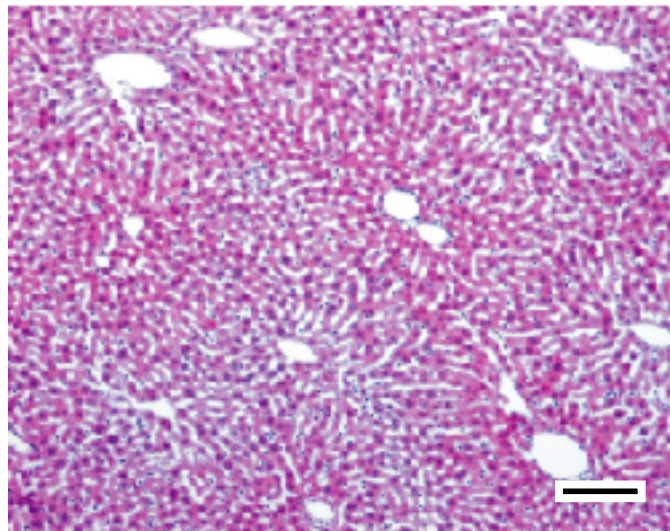

*AY/a*

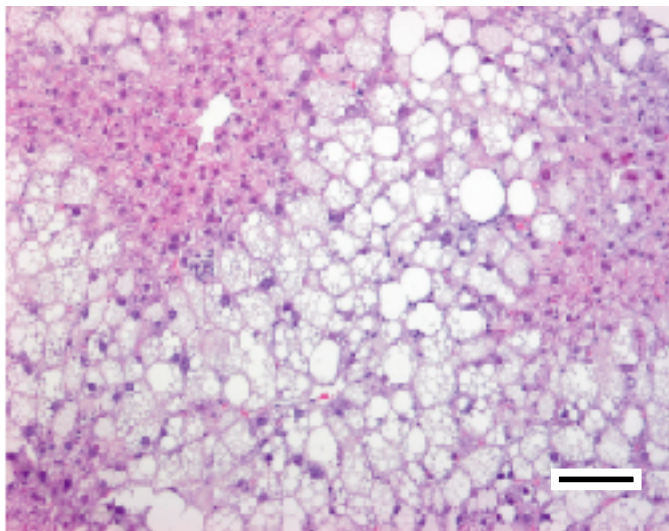

*Dmbx1*<sup>-/-</sup>;*AY/a*

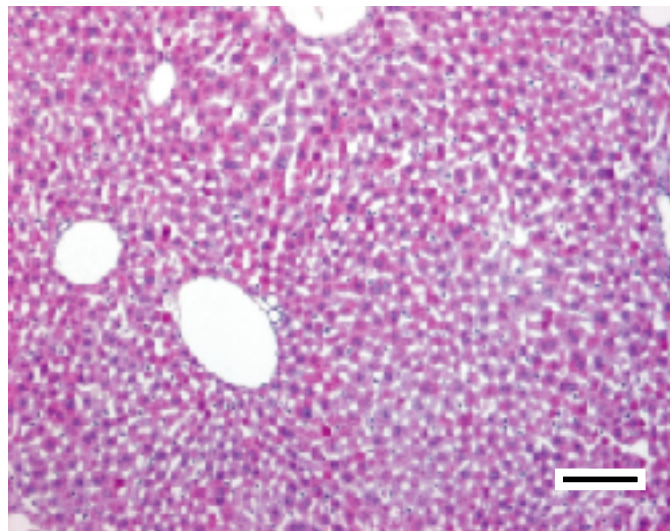

Supplement: pnas_0707328104_3.pdf [file pnas_0707328104_3.pdf]

PBS

Leptin

*Dmbx1*<sup>+/+</sup>

*Dmbx1*<sup>-/-</sup>

*Dmbx1*<sup>+/+</sup>

*Dmbx1*<sup>-/-</sup>

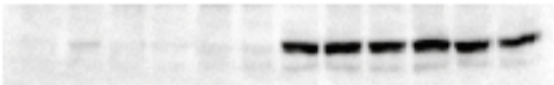

pY STAT3

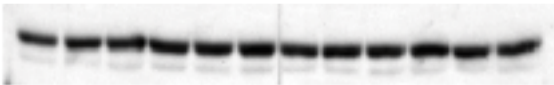

STAT3

Supplement: pnas_0707328104_4.pdf [file pnas_0707328104_4.pdf]

*Dmbx1*<sup>+/+</sup>

*Dmbx1*<sup>-/-</sup>

AgRP

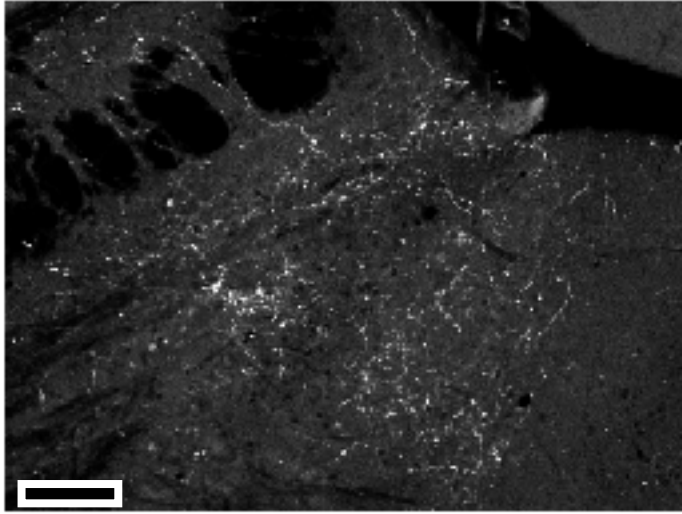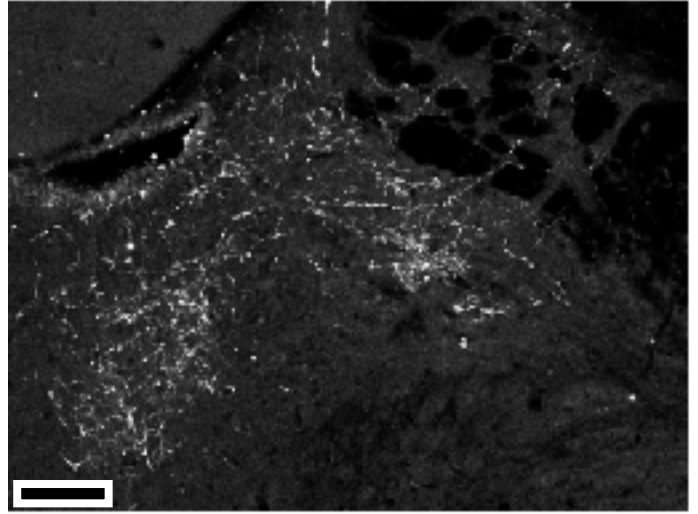

$\alpha$ -MSH

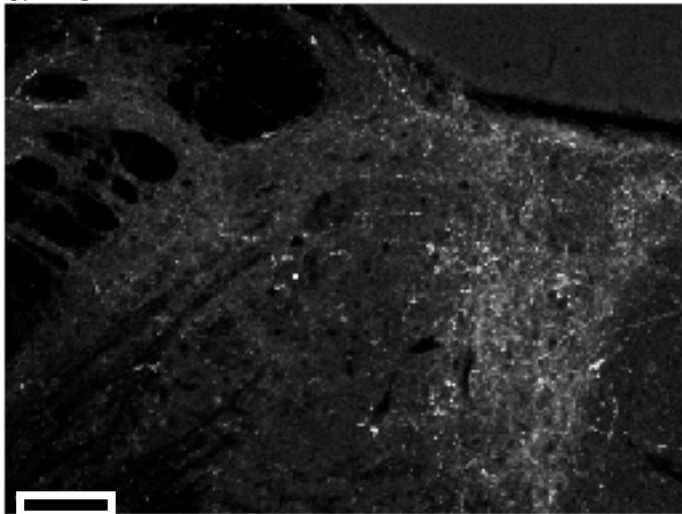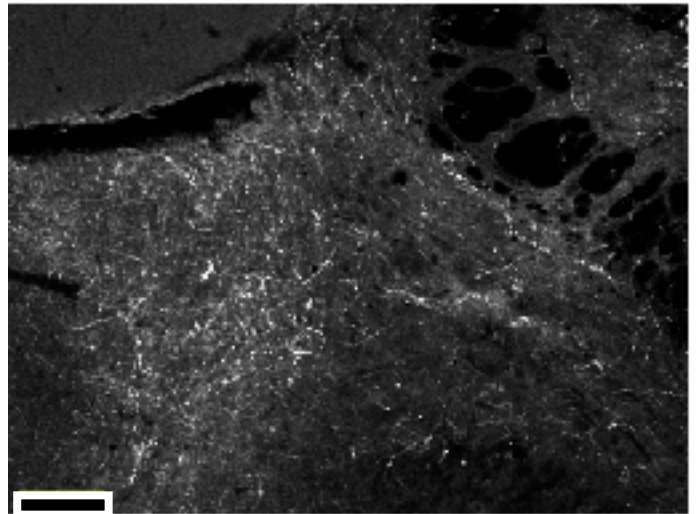

Nissl staining

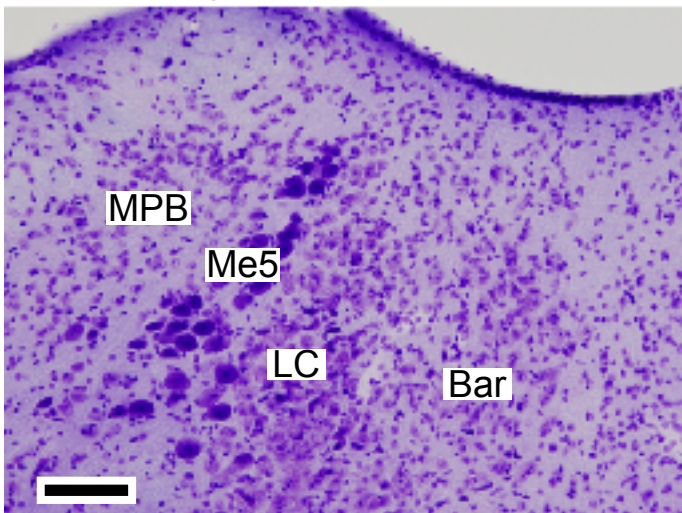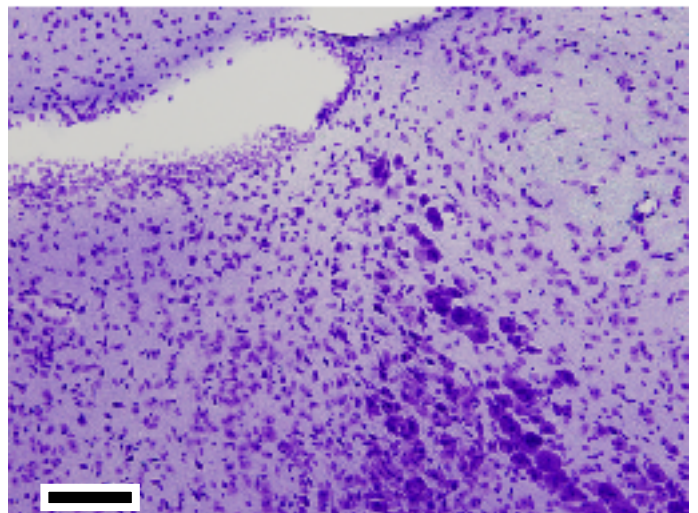

Supplement: pnas_0707328104_5.pdf [file pnas_0707328104_5.pdf]

*Dmbx1*<sup>+/+</sup>

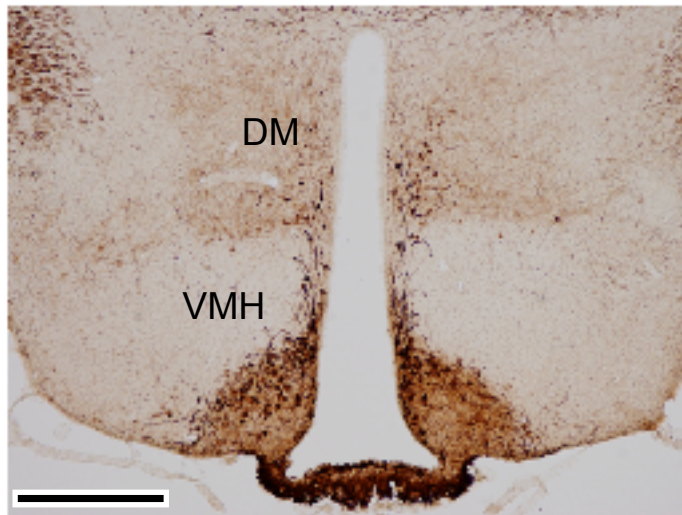

*Dmbx1*<sup>-/-</sup>

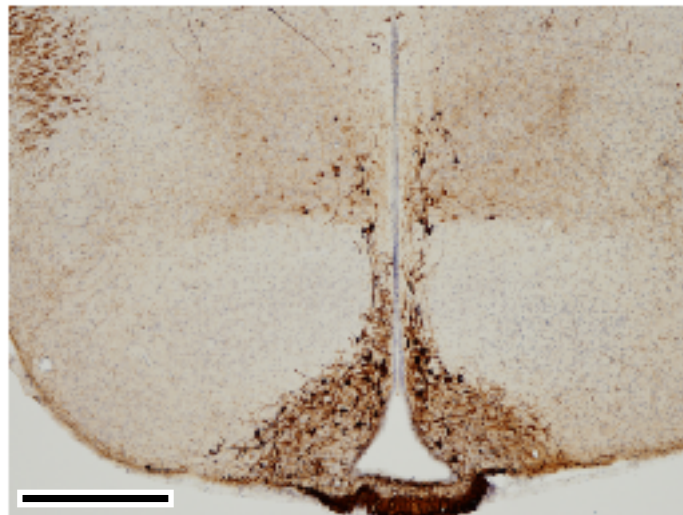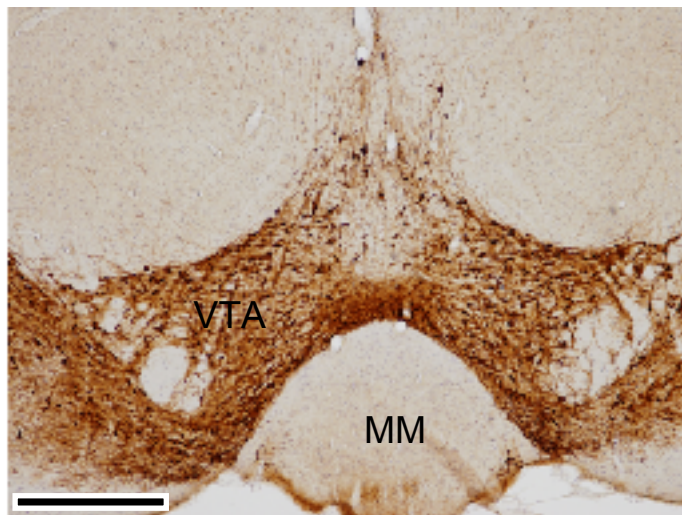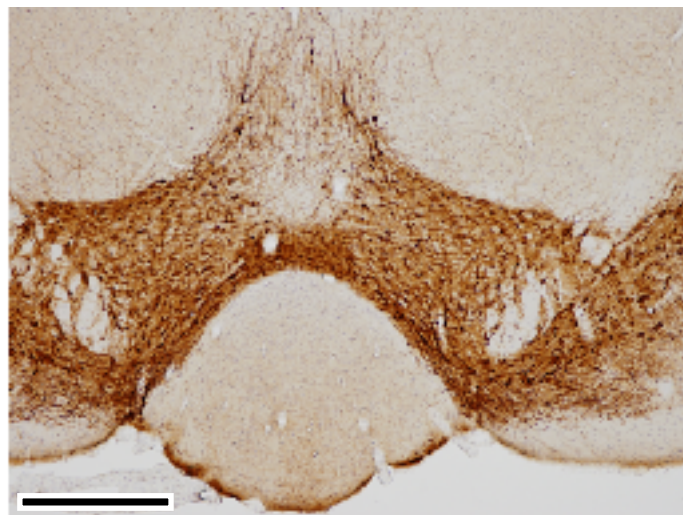

Supplement: pnas_0707328104_6.pdf [file pnas_0707328104_6.pdf]

*Dmbx1*<sup>+/+</sup>

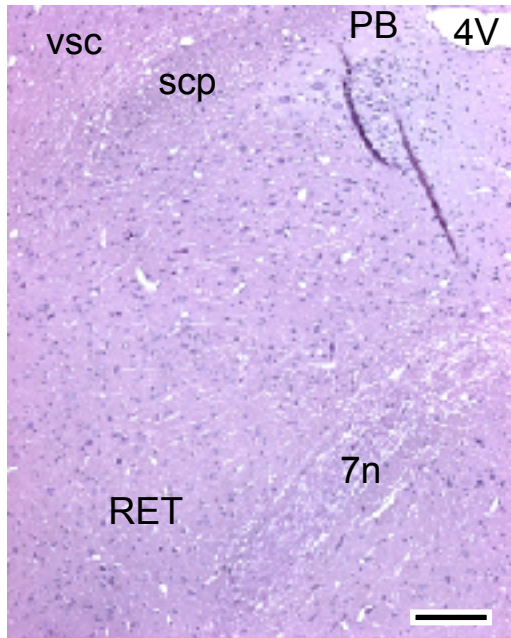

*Dmbx1*<sup>-/-</sup>

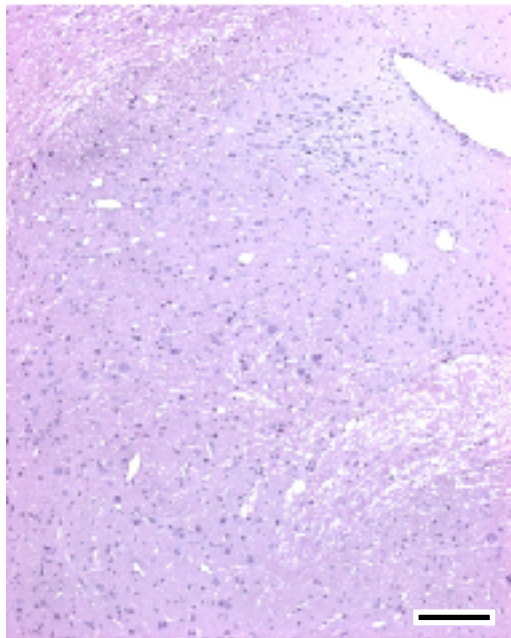

Supplement: pnas_0707328104_7.pdf [file pnas_0707328104_7.pdf]

**A**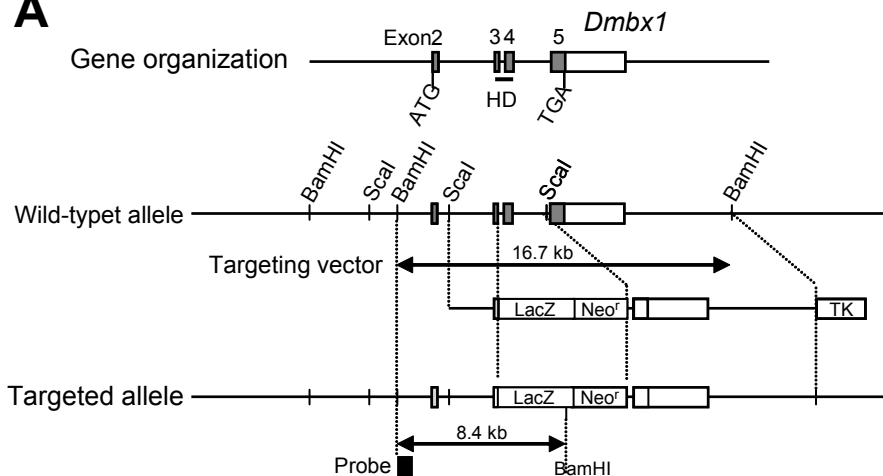**B**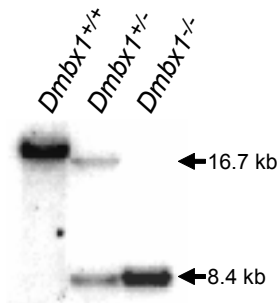**C**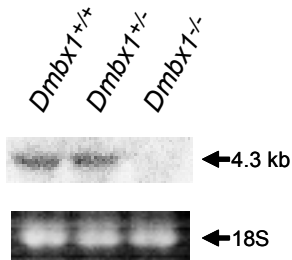

Supplement: pnas_0707328104_8.pdf [file pnas_0707328104_8.pdf]
